# Supplementary material for: Cognitive and Emotional Symptoms Induced by Chronic Stress Are Regulated by EGR1 in a Subpopulation of Hippocampal Pyramidal Neurons
Source: MDPI journal article supplement (doi:10.3390/ijms24043833), 2023-02-14
Supplement: s1 [file s1]

## SUPPLEMENTARY MATERIAL

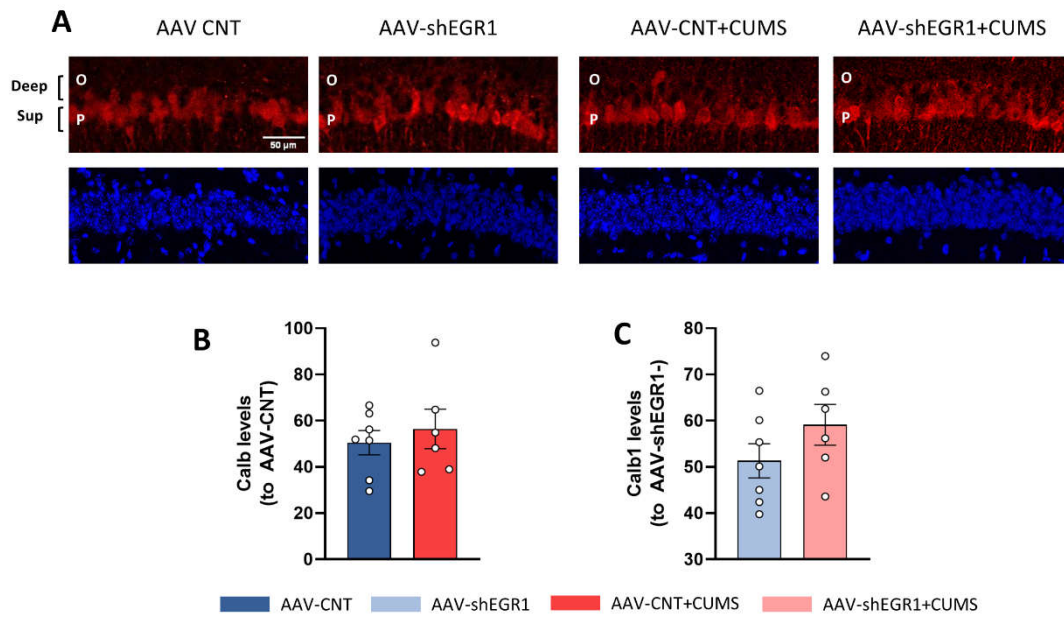

**Supplementary Figure S1:** Calb1 levels are not altered after Egr1 downregulation. Representative images of Calb1 staining in the CA1 of the hippocampus (A). Quantification of Calb1 optical density (IOD) in mice injected with AAV5-CAG-FLEX-GFP (B). Quantification of Calb1 optical density (IOD) in mice injected with AAV-shEGR1 (C). N=6-7 mice per group. O, Stratum oriens; P, Stratum pyramidale.
